# Supplementary material for: Advanced Foot-And-Mouth Disease Vaccine Platform for Stimulation of Simultaneous Cellular and Humoral Immune Responses
Source: PubMed Central journal article supplement (PMC7349985; doi:10.3390/vaccines8020254), 2020-05-28
Supplement: vaccines-08-00254-s001.pdf [file vaccines-08-00254-s001.pdf]

## Supplementary Materials

**A**

(A)

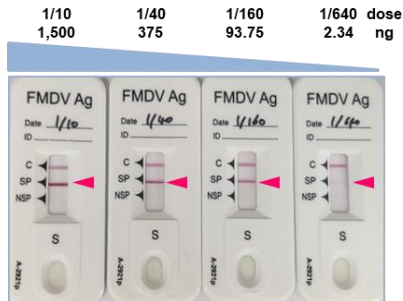

(B)

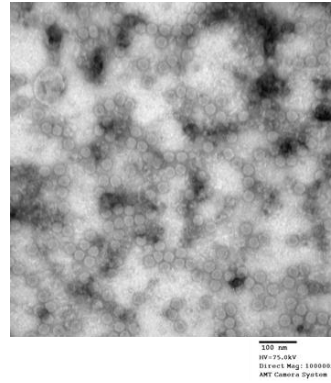

**A-3A**

(C)

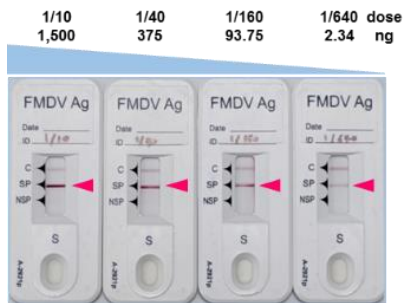

(D)

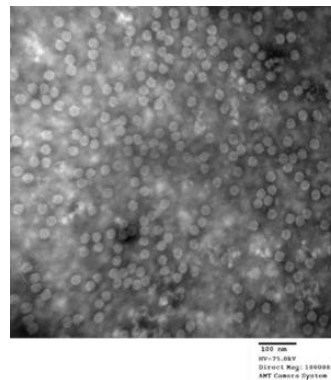

**A-HSP70**

(E)

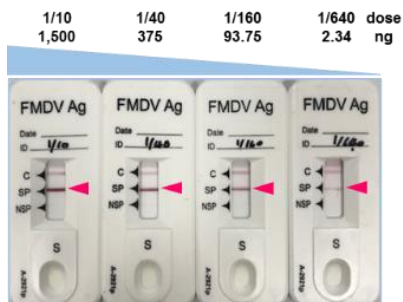

(F)

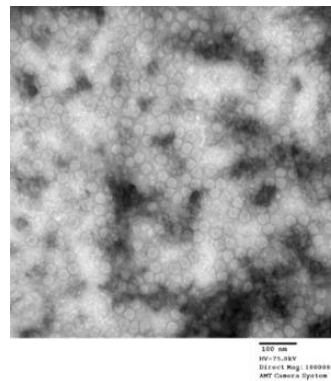

**Figure S1.** Serially diluted detection of the inactivated FMDV (A-3A, A-HSP70) antigen using a rapid test kit for type A (PBM kit for type A), and electron microscopic examination of inactivated antigen of immunopotent FMD vaccine strains; Structural proteins (SPs) of purified antigen expression of cells infected with immunopotent recombinant FMDV A-3A and A-HSP70 were confirmed by rapid antigen kits (PBM kit) showing band formation for SPs and no band formation for non-structural proteins (NSPs) of FMDV. The virus particle (146S) was characterized by transmission electron microscope (TEM) imaging. (A–F) represent (A) SP and no NSP band formation of A antigen; (B) TEM imaging of A antigen (146S particles); (C) SP and no NSP band formation of A-3A antigen; (D) TEM imaging of A-3A antigen (146S particles); (E) SP and no NSP band formation of A-HSP70 antigen; (F) TEM imaging of A-HSP70 antigen (146S particles).

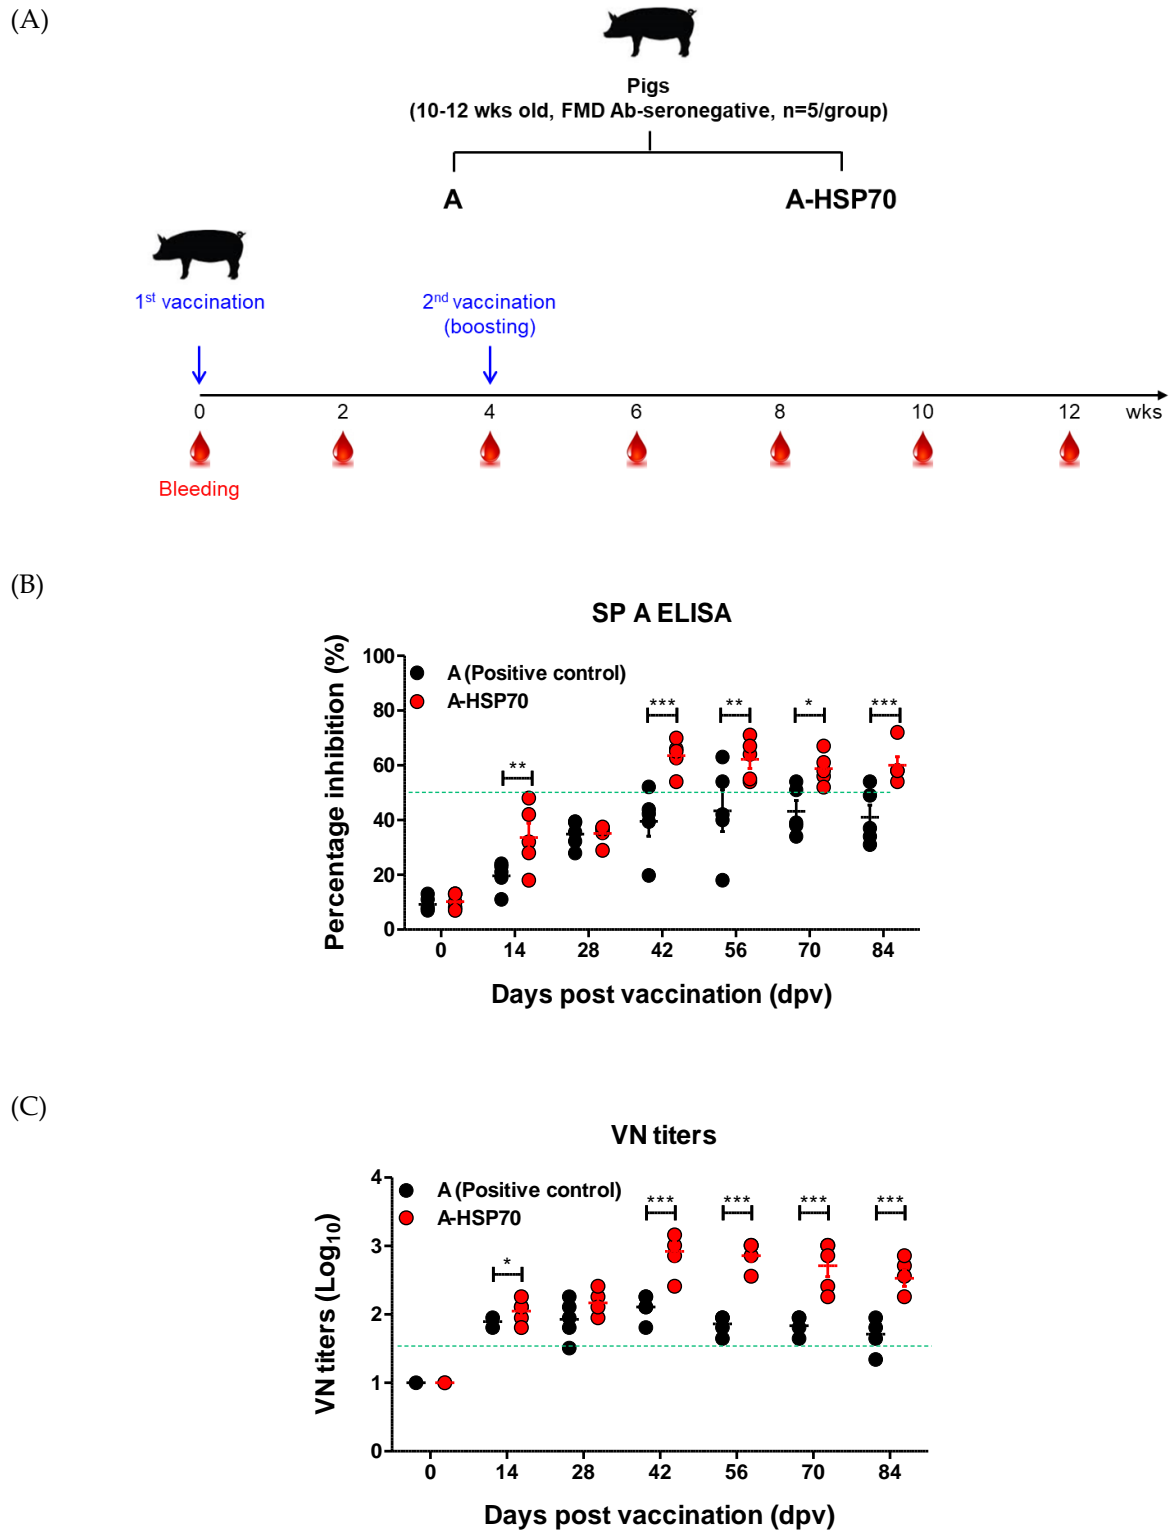

**Figure S2.** A-HSP70-mediated immune response in pig. Pigs were administered a test vaccine including the A-HSP70 antigen based on the vaccine composition of the positive control group (n = 5/group). The positive control group of pigs received 15 µg (1 dose for pig use) of A antigen, ISA 206 (50%, w/w), 10% Al(OH)<sub>3</sub>, and 150 µg Quil-A. The vaccination was performed twice at a 28-day interval, and 1 ml of vaccine (1 dose) was injected intramuscularly deep into the animal's necks. Blood samples were collected at 0, 14, 28, 42, 56, 70, and 84 dpv from the pigs for the serological assays. (A–C) represent (A) the strategy for this study; (B) antibody titers by SP A ELISA; (C) virus-neutralizing antibody titers. The data represent the mean ± SEM of triplicate measurements; statistical analyses

were performed using a two-way ANOVA with a Bonferroni correction; \* $p < 0.05$ , \*\* $p < 0.01$ , \*\*\* $p < 0.001$ .

**Table S1.** List of primer sequences for qRT-PCR.

| Target       | Forward/Reverse | Sequence (5'-3')       | Length (mer) |
|--------------|-----------------|------------------------|--------------|
| CD40         | CD40 F          | GCCAGGACAGAACTGGTGA    | 20           |
|              | CD40 R          | ATTCGCTGGAAGTCAAGGA    | 20           |
| CD80         | CD80 F          | TCAGGCATCGTTCAGGTGAC   | 20           |
|              | CD80 R          | TGACAGCCAGCACCATTTC    | 20           |
| CD86         | CD86 F          | GTTGTGTGTGGGATGGTGTGTC | 20           |
|              | CD86 R          | GTTTGTTCCTCGCCTTCCTG   | 21           |
| MHC Class I  | MHC Class I F   | GAGTGGACCTGAAGACCCTG   | 20           |
|              | MHC Class I R   | CATGCTCTGGAGGGTGTGAG   | 20           |
| MHC Class II | MHC Class II F  | CTCCAGTGATGCTGGGTCAG   | 20           |
|              | MHC Class II R  | TGACAGAGTGCCCGTTCCTC   | 20           |
| CTLA-4       | CTLA-4 F        | TCTACATGCACTGGCACCTC   | 20           |
|              | CTLA-4 R        | CCGTTGCCCATACCCACATA   | 20           |
| IFN $\alpha$ | IFN $\alpha$ F  | CATCTGCTCTCTGGGCTGTG   | 20           |
|              | IFN $\alpha$ R  | TGAGGGGATCCAAAGTCCCT   | 20           |
| IFN $\beta$  | IFN $\beta$ F   | TGCAACCACCACAATTCCAGA  | 21           |
|              | IFN $\beta$ R   | GGTTTCATTCCAGCCAGTGC   | 20           |
| IFN $\gamma$ | IFN $\gamma$ F  | GCCATTCAAAGGAGCATGGAT  | 21           |
|              | IFN $\gamma$ R  | CTGATGGCTTTGCGCTGGAT   | 20           |
| IL-12p40     | IL-12p40 F      | CCATATCCAGTGCGGGGATG   | 20           |
|              | IL-12p40 R      | AGGCCTTGGTGGATCCTTTG   | 20           |
| IL-17A       | IL-17A F        | CTCGTGAAGGCGGGAATCAT   | 20           |
|              | IL-17A R        | GGTGTGCTCCGGTTCAAGAT   | 20           |
| HPRT         | HPRT F          | GAGGCCATCACATCGTAGCC   | 20           |
|              | HPRT R          | TGTAATCCAGCAGGTCAGCA   | 20           |

**Table S2.** Statistical analysis of the data from Figure 2. C57BL/6 mice were administered with the test vaccine, including 1/10, 1/40, 1/160, 1/640 doses of A-3A or A-HSP70 antigen for cattle or pig use, ISA 206 (oil-based emulsion, 50%, w/w), 10% Al(OH)<sub>3</sub>, and 15  $\mu$ g Quil-A. A negative control group of mice was injected with the same volume of PBS as the vaccine. The test vaccines were injected intramuscularly into mice that were later challenged with FMDV (100 LD<sub>50</sub> A/Malay/97) at 7 dpv. The survival rates and body weights were monitored for 7 dpc. (A, B) represent (A) Changes of body weight for A-3A administrated group; (B) Changes of body weight for A-HSP70 administrated group. The data are the means  $\pm$  SEM of triplicate measurements ( $n = 5$ /group) and significance was determined using two-way ANOVAs with Bonferroni correction. \* $p < 0.05$ ; \*\* $p < 0.01$ ; \*\*\* $p < 0.001$ ; ns, not significant.

| (A)                  |    |                     |                     |                      |
|----------------------|----|---------------------|---------------------|----------------------|
| 1 dpc                |    |                     |                     |                      |
|                      | NC | A-3A<br>(1/10 dose) | A-3A<br>(1/40 dose) | A-3A<br>(1/160 dose) |
| A-3A<br>(1/10 dose)  | ns |                     |                     |                      |
| A-3A<br>(1/40 dose)  | ns | ns                  |                     |                      |
| A-3A<br>(1/160 dose) | ns | ns                  | ns                  |                      |
| A-3A                 | ns | ns                  | ns                  | ns                   |

| (1/640 dose)         |     |                     |                     |                      |
|----------------------|-----|---------------------|---------------------|----------------------|
| <b>2 dpc</b>         |     |                     |                     |                      |
|                      | NC  | A-3A<br>(1/10 dose) | A-3A<br>(1/40 dose) | A-3A<br>(1/160 dose) |
| A-3A<br>(1/10 dose)  | *** |                     |                     |                      |
| A-3A<br>(1/40 dose)  | *** | ns                  |                     |                      |
| A-3A<br>(1/160 dose) | **  | *                   | *                   |                      |
| A-3A<br>(1/640 dose) | ns  | ***                 | ***                 | ns                   |
| <b>3 dpc</b>         |     |                     |                     |                      |
|                      | NC  | A-3A<br>(1/10 dose) | A-3A<br>(1/40 dose) | A-3A<br>(1/160 dose) |
| A-3A<br>(1/10 dose)  |     |                     |                     |                      |
| A-3A<br>(1/40 dose)  |     | ns                  |                     |                      |
| A-3A<br>(1/160 dose) |     | ns                  | ns                  |                      |
| A-3A<br>(1/640 dose) |     | ns                  | ns                  | ns                   |
| <b>4 dpc</b>         |     |                     |                     |                      |
|                      | NC  | A-3A<br>(1/10 dose) | A-3A<br>(1/40 dose) | A-3A<br>(1/160 dose) |
| A-3A<br>(1/10 dose)  |     |                     |                     |                      |
| A-3A<br>(1/40 dose)  |     | ns                  |                     |                      |
| A-3A<br>(1/160 dose) |     | ns                  | *                   |                      |
| A-3A<br>(1/640 dose) |     | ***                 | ***                 | ns                   |
| <b>5 dpc</b>         |     |                     |                     |                      |
|                      | NC  | A-3A<br>(1/10 dose) | A-3A<br>(1/40 dose) | A-3A<br>(1/160 dose) |
| A-3A<br>(1/10 dose)  |     |                     |                     |                      |
| A-3A<br>(1/40 dose)  |     | ns                  |                     |                      |
| A-3A<br>(1/160 dose) |     | ns                  | **                  |                      |
| A-3A<br>(1/640 dose) |     | ***                 | ***                 | **                   |
| <b>6 dpc</b>         |     |                     |                     |                      |
|                      | NC  | A-3A<br>(1/10 dose) | A-3A<br>(1/40 dose) | A-3A<br>(1/160 dose) |
| A-3A<br>(1/10 dose)  |     |                     |                     |                      |
| A-3A                 |     | ns                  |                     |                      |

|              |     |                     |                     |                      |
|--------------|-----|---------------------|---------------------|----------------------|
| (1/40 dose)  |     |                     |                     |                      |
| A-3A         |     | *                   | **                  |                      |
| (1/160 dose) |     |                     |                     |                      |
| A-3A         |     | ***                 | ***                 | ns                   |
| (1/640 dose) |     |                     |                     |                      |
| <b>7 dpc</b> |     |                     |                     |                      |
|              | NC  | A-3A<br>(1/10 dose) | A-3A<br>(1/40 dose) | A-3A<br>(1/160 dose) |
| A-3A         |     |                     |                     |                      |
| (1/10 dose)  |     |                     |                     |                      |
| A-3A         |     | ns                  |                     |                      |
| (1/40 dose)  |     |                     |                     |                      |
| A-3A         |     | **                  | **                  |                      |
| (1/160 dose) |     |                     |                     |                      |
| A-3A         |     | ***                 | ***                 | ns                   |
| (1/640 dose) |     |                     |                     |                      |
| (B)          |     |                     |                     |                      |
| <b>1 dpc</b> |     |                     |                     |                      |
|              | NC  | A-3A<br>(1/10 dose) | A-3A<br>(1/40 dose) | A-3A<br>(1/160 dose) |
| A-3A         | ns  |                     |                     |                      |
| (1/10 dose)  |     |                     |                     |                      |
| A-3A         | ns  | ns                  |                     |                      |
| (1/40 dose)  |     |                     |                     |                      |
| A-3A         | ns  | ns                  | ns                  |                      |
| (1/160 dose) |     |                     |                     |                      |
| A-3A         | ns  | ns                  | ns                  | ns                   |
| (1/640 dose) |     |                     |                     |                      |
| <b>2 dpc</b> |     |                     |                     |                      |
|              | NC  | A-3A<br>(1/10 dose) | A-3A<br>(1/40 dose) | A-3A<br>(1/160 dose) |
| A-3A         | *** |                     |                     |                      |
| (1/10 dose)  |     |                     |                     |                      |
| A-3A         | *** | ns                  |                     |                      |
| (1/40 dose)  |     |                     |                     |                      |
| A-3A         | ns  | ***                 | ***                 |                      |
| (1/160 dose) |     |                     |                     |                      |
| A-3A         | ns  | **                  | ***                 | ns                   |
| (1/640 dose) |     |                     |                     |                      |
| <b>3 dpc</b> |     |                     |                     |                      |
|              | NC  | A-3A<br>(1/10 dose) | A-3A<br>(1/40 dose) | A-3A<br>(1/160 dose) |
| A-3A         |     |                     |                     |                      |
| (1/10 dose)  |     |                     |                     |                      |
| A-3A         |     | ns                  |                     |                      |
| (1/40 dose)  |     |                     |                     |                      |
| A-3A         |     | **                  | **                  |                      |
| (1/160 dose) |     |                     |                     |                      |
| A-3A         |     | **                  | **                  | ns                   |
| (1/640 dose) |     |                     |                     |                      |
| <b>4 dpc</b> |     |                     |                     |                      |

|                      | NC | A-3A<br>(1/10 dose) | A-3A<br>(1/40 dose) | A-3A<br>(1/160 dose) |
|----------------------|----|---------------------|---------------------|----------------------|
| A-3A<br>(1/10 dose)  |    |                     |                     |                      |
| A-3A<br>(1/40 dose)  |    | ns                  |                     |                      |
| A-3A<br>(1/160 dose) |    | ***                 | **                  |                      |
| A-3A<br>(1/640 dose) |    | ***                 | **                  | ns                   |
| <b>5 dpc</b>         |    |                     |                     |                      |
|                      | NC | A-3A<br>(1/10 dose) | A-3A<br>(1/40 dose) | A-3A<br>(1/160 dose) |
| A-3A<br>(1/10 dose)  |    |                     |                     |                      |
| A-3A<br>(1/40 dose)  |    | ns                  |                     |                      |
| A-3A<br>(1/160 dose) |    |                     |                     |                      |
| A-3A<br>(1/640 dose) |    |                     |                     |                      |
| <b>6 dpc</b>         |    |                     |                     |                      |
|                      | NC | A-3A<br>(1/10 dose) | A-3A<br>(1/40 dose) | A-3A<br>(1/160 dose) |
| A-3A<br>(1/10 dose)  |    |                     |                     |                      |
| A-3A<br>(1/40 dose)  |    | ns                  |                     |                      |
| A-3A<br>(1/160 dose) |    |                     |                     |                      |
| A-3A<br>(1/640 dose) |    |                     |                     |                      |
| <b>7 dpc</b>         |    |                     |                     |                      |
|                      | NC | A-3A<br>(1/10 dose) | A-3A<br>(1/40 dose) | A-3A<br>(1/160 dose) |
| A-3A<br>(1/10 dose)  |    |                     |                     |                      |
| A-3A<br>(1/40 dose)  |    | ns                  |                     |                      |
| A-3A<br>(1/160 dose) |    |                     |                     |                      |
| A-3A<br>(1/640 dose) |    |                     |                     |                      |

**Table S3.** Statistical analysis of the data from Figure 3. C57BL/6 mice were administrated with oil emulsion free-test vaccines, including A-3A antigen alone, A-HSP70 antigen alone, or a combination of A-3A and A-HSP70 antigens based on their positive control composition. The negative control group received PBS in the same volume as the vaccine. A positive control group received 1.5 µg (1/10 dose for cattle and pig use) of naïve A antigen, without oil emulsion, 10% Al(OH)<sub>3</sub>, and 15 µg Quil-A without oil emulsion. Briefly, vaccination was performed twice at a 35-day interval; the mice were vaccinated intramuscularly in the thigh muscle. Later, at 84 dpv or 168 dpv, the mice were challenged with FMDV (100 LD<sub>50</sub> of A/Malay-97, SEA topotype) by intraperitoneal (I.P.) injection. Their survival

rates and body weights were monitored for 7 dpc. (A, B) represent (A) Changes of body weight for challenged group with A/Malay/97 on 84 dpv; (B) Changes of body weight for challenged group with A/Malay/97 on 168 dpv. The data are the means  $\pm$  SEM of triplicate measurements ( $n = 5/\text{group}$ ) and significance was determined using two-way ANOVAs with Bonferroni correction and a one-way ANOVA followed by a Tukey's post-hoc test. \* $p < 0.05$ ; \*\* $p < 0.01$ ; \*\*\* $p < 0.001$ ; ns, not significant.

| (A)          |     |     |      |         |
|--------------|-----|-----|------|---------|
| <b>1 dpc</b> |     |     |      |         |
|              | NC  | A   | A-3A | A-HSP70 |
| A            | *** |     |      |         |
| A-3A         | ns  | *** |      |         |
| A-HSP70      | *** | ns  | **   |         |
| A-3A+A-HSP70 | ns  | *** | ns   | *       |
| <b>2 dpc</b> |     |     |      |         |
|              | NC  | A   | A-3A | A-HSP70 |
| A            | *   |     |      |         |
| A-3A         | *** | *** |      |         |
| A-HSP70      | **  | *** | ***  |         |
| A-3A+A-HSP70 | *** | *** | ns   | **      |
| <b>3 dpc</b> |     |     |      |         |
|              | NC  | A   | A-3A | A-HSP70 |
| A            |     |     |      |         |
| A-3A         |     | *** |      |         |
| A-HSP70      |     | *** | *    |         |
| A-3A+A-HSP70 |     | *** | ns   | ns      |
| <b>4 dpc</b> |     |     |      |         |
|              | NC  | A   | A-3A | A-HSP70 |
| A            |     |     |      |         |
| A-3A         |     | *** |      |         |
| A-HSP70      |     | *** | ns   |         |
| A-3A+A-HSP70 |     | *** | ns   | ns      |
| <b>5 dpc</b> |     |     |      |         |
|              | NC  | A   | A-3A | A-HSP70 |
| A            |     |     |      |         |
| A-3A         |     |     |      |         |
| A-HSP70      |     |     | ns   |         |
| A-3A+A-HSP70 |     |     | ns   | ns      |
| <b>6 dpc</b> |     |     |      |         |
|              | NC  | A   | A-3A | A-HSP70 |
| A            |     |     |      |         |
| A-3A         |     |     |      |         |
| A-HSP70      |     |     | ns   |         |
| A-3A+A-HSP70 |     |     | ns   | ns      |
| <b>7 dpc</b> |     |     |      |         |
|              | NC  | A   | A-3A | A-HSP70 |
| A            |     |     |      |         |
| A-3A         |     |     |      |         |
| A-HSP70      |     |     | ns   |         |
| A-3A+A-HSP70 |     |     | ns   | ns      |
| (B)          |     |     |      |         |
| <b>1 dpc</b> |     |     |      |         |

|              | NC  | A   | A-3A | A-HSP70 |
|--------------|-----|-----|------|---------|
| A            | ns  |     |      |         |
| A-3A         | ns  | ns  |      |         |
| A-HSP70      | ns  | ns  | ns   |         |
| A-3A+A-HSP70 | ns  | ns  | ns   | ns      |
| <b>2 dpc</b> |     |     |      |         |
|              | NC  | A   | A-3A | A-HSP70 |
| A            | *** |     |      |         |
| A-3A         | *** | *** |      |         |
| A-HSP70      | *** | **  | ns   |         |
| A-3A+A-HSP70 | *** | *   | *    | ns      |
| <b>3 dpc</b> |     |     |      |         |
|              | NC  | A   | A-3A | A-HSP70 |
| A            |     |     |      |         |
| A-3A         |     | *** |      |         |
| A-HSP70      |     | **  | ns   |         |
| A-3A+A-HSP70 |     | **  | ns   | ns      |
| <b>4 dpc</b> |     |     |      |         |
|              | NC  | A   | A-3A | A-HSP70 |
| A            |     |     |      |         |
| A-3A         |     | *** |      |         |
| A-HSP70      |     | *** | ns   |         |
| A-3A+A-HSP70 |     | **  | *    | ns      |
| <b>5 dpc</b> |     |     |      |         |
|              | NC  | A   | A-3A | A-HSP70 |
| A            |     |     |      |         |
| A-3A         |     |     |      |         |
| A-HSP70      |     |     | ns   |         |
| A-3A+A-HSP70 |     |     | ns   | ns      |
| <b>6 dpc</b> |     |     |      |         |
|              | NC  | A   | A-3A | A-HSP70 |
| A            |     |     |      |         |
| A-3A         |     |     |      |         |
| A-HSP70      |     |     | ns   |         |
| A-3A+A-HSP70 |     |     | *    | ns      |
| <b>7 dpc</b> |     |     |      |         |
|              | NC  | A   | A-3A | A-HSP70 |
| A            |     |     |      |         |
| A-3A         |     |     |      |         |
| A-HSP70      |     |     | ns   |         |
| A-3A+A-HSP70 |     |     | *    | ns      |
